# Supplementary material for: Semi-automation of process analytics reduces operator effect
Source: PubMed Central journal article supplement (PMC7125066; doi:10.1007/s00449-019-02254-y), 2019-12-07
Supplement: 449_2019_2254_MOESM1_ESM.pdf [file 449_2019_2254_MOESM1_ESM.pdf]

# Supplementary Material

Bioprocess and Biosystems Engineering, Springer

## Semi-automation of process analytics reduces operator effect

A. Christler<sup>1</sup>, E. Felföldi<sup>1</sup>, M. Mosor<sup>1</sup>, D. Sauer<sup>1</sup>, N. Walch<sup>1</sup>, A. Dürauer<sup>1,2</sup>, A. Jungbauer<sup>1,2</sup>

<sup>1</sup> Austrian Centre of Industrial Biotechnology, Muthgasse 11, A-1190 Vienna, Austria

<sup>2</sup> Institute of Bioprocess Science and Engineering, Department of Biotechnology, University of Natural Resources and Life Sciences, Vienna, Muthgasse 18, A-1190 Vienna, Austria

E-mail: [alois.jungbauer@boku.ac.at](mailto:alois.jungbauer@boku.ac.at)

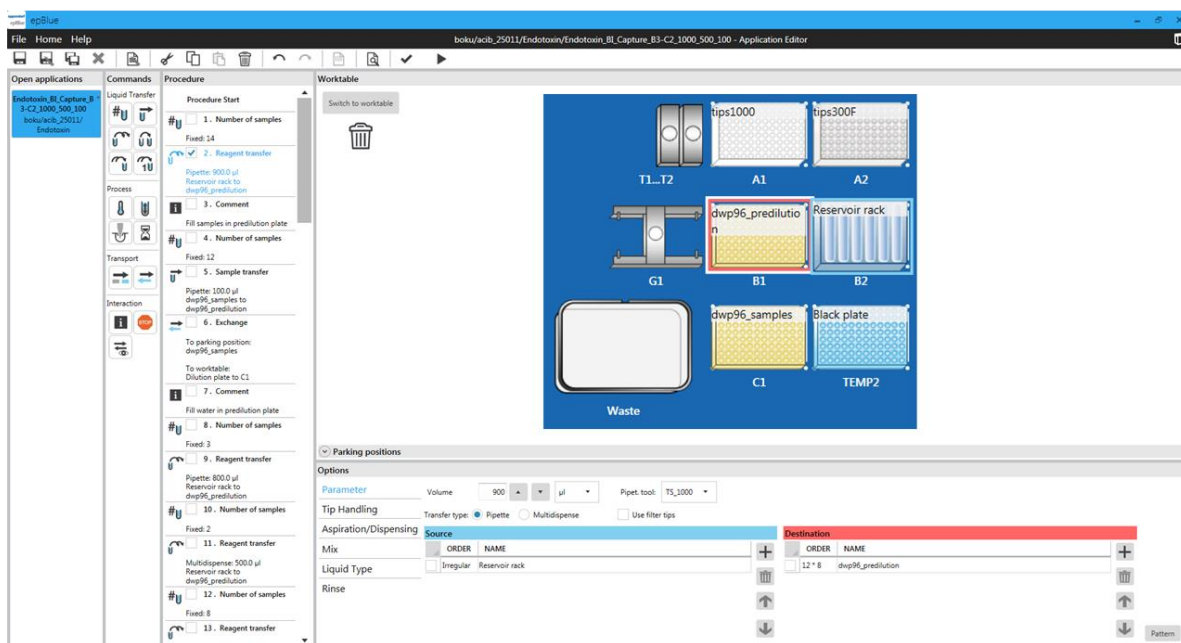

Figure S1: Representation of the epBlue™ Application Editor used to control the LHS.

## Calculation and data import into LHS and sample dilution scheme for binding affinity assay

Process samples were diluted in 96-well 2 mL deepwell plates starting in column 1 with a 1:10 dilution. Up to 4 serial 1:10 dilutions were carried out by transfer to columns 2 – 4 (see **Figure S2B**). Higher one-step dilution factors were avoided in all methods for accuracy reasons. In column 5, individual dilutions are performed for each sample to reach a common concentration for all samples (normalization step). In columns 6 to 9 all samples were diluted simultaneously with the 8-channel tool to levels around the dissociation constant  $K_D$  of FGF-2 to FGF receptor 2 which was found to be in the range of 1 to 4 nM.

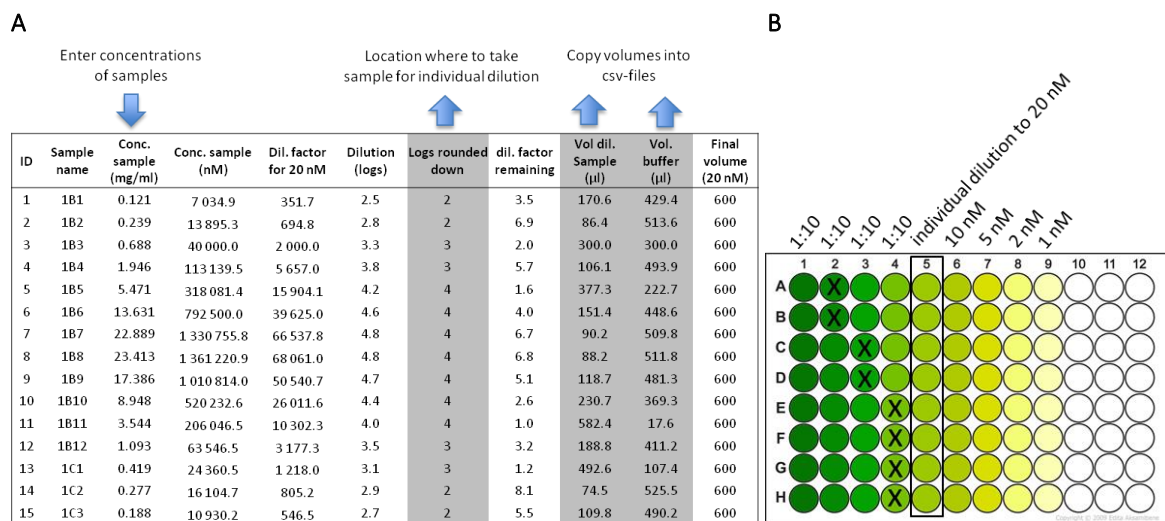

Figure S2: Sample preparation by semi-automated dilution for binding affinity measurement of FGF-2. (A) Calculation sheet to determine dilution steps. Csv-files are loaded into the LHS control software. (B) Scheme of dilution plate (96-well 2 mL deepwell plate). Every sample is diluted to 1, 2, 5, 10 and 20 nM.

## Development of the plate wash procedure

A plate wash procedure for HCP ELISA was set-up on the LHS by sequentially dispensing and aspirating wash buffer. In order to remove as much of the wash solution out of the wells as possible in each step, the lowest tip position was determined at which none of the 8 tips touched the bottom of the wells. Keeping a distance to the bottom was important in order not to disturb the bound surface layer. This distance between well bottom and tip was eventually 0.8 mm. The remaining liquid volume after aspiration was 20 – 25  $\mu\text{L}$ /well. In manual plate wash, wells are filled with multi-channel pipette and emptied by gravitational and mechanical force resulting in only the surface adsorbed liquid layer to remain in the wells.

Prior to the washing procedure the well were filled with a GFP solution in order to be able to rapidly and accurately determine the residual amount of protein. After each cycle of liquid aspiration and dispense of fresh wash buffer, the amount of remaining substance was determined by fluorescence measurement of GFP. The signal amplification factor (gain) was increased from 65 to 90 as the amount of substance decreased. Sequences with same number and one additional wash cycle were compared to manual plate wash for their efficiency to remove unbound substances (see **Figure 3A**). After manual wash the signal of GFP was 9% higher than the blank and in automated wash procedure the difference varied from 9 - 28%. (**Figure 3B**). The 16% difference compared to 9% was not considered as significant and therefore also included in further evaluations.

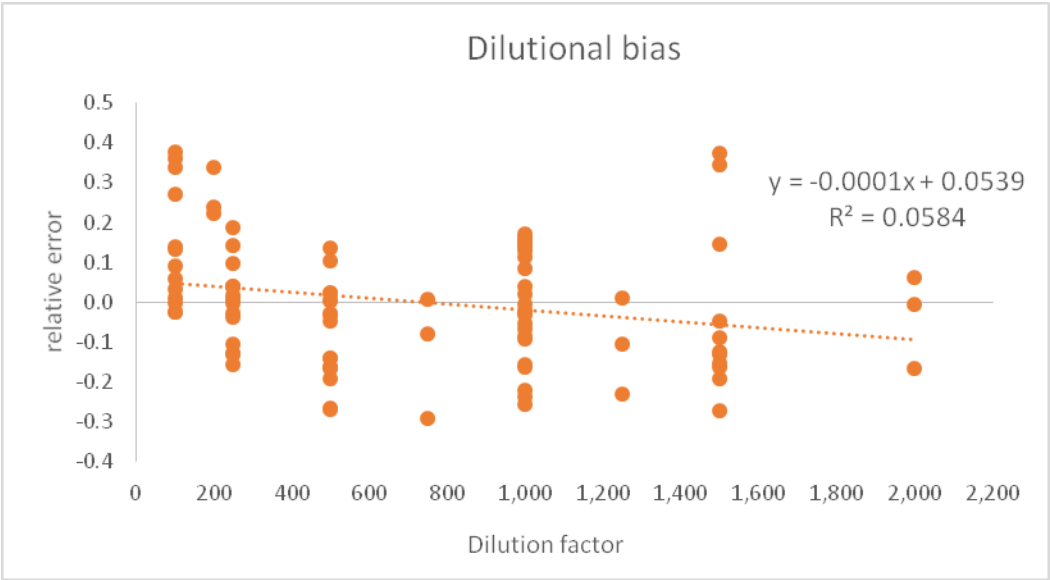

Figure S4: Dependence of results of DNA measurements on dilution factors (proportional bias).

Table S1: Details to Figure 5 on duration of assays in manual and semi-automated ways.

| Analyte (Assay)                                                                  | Method         | Same in both methods                                                                                      |       |              |       | Manual in semi-automated |              |       | Sample dilution <sup>a</sup> |                 |              |      | Total | Working time saved |
|----------------------------------------------------------------------------------|----------------|-----------------------------------------------------------------------------------------------------------|-------|--------------|-------|--------------------------|--------------|-------|------------------------------|-----------------|--------------|------|-------|--------------------|
|                                                                                  |                | Steps                                                                                                     | [min] | StdDev [min] | RSD   | [min]                    | StdDev [min] | RSD   | manual [min]                 | Automated [min] | StdDev [min] | RSD  |       |                    |
| Host Cell Proteins (ELISA)                                                       | manual         | Preparations, plate coating and blocking, 4x plate wash, measuring absorbance, data evaluation, cleaning. | 75.8  | 3.1          | 4.1%  |                          |              |       | 43.3                         |                 | 0.577        | 1.3% | 119.1 |                    |
|                                                                                  | semi-automated |                                                                                                           |       |              |       | 31.75                    | 4.99         | 15.7% |                              | 62.7            | 1.50         | 2.4% | 94.5  | 11.6               |
| Endotoxins (Factor C)                                                            | manual         | Preparations, mix reagent and add to samples, measure fluorescence, data evaluation, cleaning.            | 31.2  | 4.8          | 15.2% |                          |              |       | 55.5                         |                 | 4.5          | 8.1% | 86.7  |                    |
|                                                                                  | semi-automated |                                                                                                           |       |              |       | 2.3                      | 0.6          | 24.7% |                              | 53.7            | 0.1          | 0.2% | 56.1  | 53.2               |
| DNA (Picogreen)                                                                  | manual         | Preparations, mix reagent and add to samples, measure fluorescence, data evaluation, cleaning.            | 46.2  | 2.9          | 6.4%  |                          |              |       | 18.7                         |                 | 1.53         | 8.2% | 64.9  |                    |
|                                                                                  | semi-automated |                                                                                                           |       |              |       | 4.5                      | 0.2          | 3.7%  |                              | 25.6            | 1.1          | 4.4% | 30.1  | 14.1               |
| Binding affinity (Biacore)                                                       | manual         | Calculation of dilutions, start SPR measuring, data evaluation, cleaning.                                 | 24    | 2.0          | 8%    |                          |              |       | 53.7                         |                 | 2.3          | 4.3% | 77.7  |                    |
|                                                                                  | semi-automated |                                                                                                           |       |              |       | 21.0                     | 0.8          | 3.6%  |                              | 27.6            | 0.3          | 1.1% | 72.5  | 32.7               |
| Total (ELISA, Endotoxin assay, Picogreen: 1x, Binding affinity: 2x) <sup>b</sup> |                |                                                                                                           |       |              |       |                          |              |       | <b>224.9</b>                 | 197.1           |              |      |       | <b>144.3</b>       |

<sup>a</sup> For ELISA also staining and stop were done manually or automated.

<sup>b</sup> Binding affinity: 8 samples per assay.
